# Supplementary material for: Protonated Phosphonic Acid Electrodes for High Power Heavy-Duty Vehicle Fuel Cells
Source: Research Square preprint supplement (doi:10.21203/rs.3.rs-542999/v1), 2021-06-07
Supplement: Supplementary file 1 [file a91ceba714b225b5be8da9bc.docx]

**Supplementary information**

**Protonated Phosphonic Acid Electrodes for High Power Heavy-Duty Vehicle Fuel Cells**

Katie H. Lim1⊥, Albert S. Lee1,2⊥, Vladimir Atanasov3, Jochen Kerres3,4,5, Santosh Adhikari1, Sandip Maurya1,Eun Joo Park1, Luis Delfin Manriquez1, Jiyoon Jung2, Cy Fujimoto6, Ivana Matanovic7, Jasna Jankovic8, Hongfei Jia9,and Yu Seung Kim1*

1MPA-11: Materials Synthesis and Integrated Devices Group, Los Alamos National Laboratory, Los Alamos, New Mexico 87545, USA.

2Materials Architecturing Research Center, Korea Institute of Science and Technology, Hwarangno 14gil-5, Seongbuk-gu, Seoul 02792, Republic of Korea.

3Institute of Chemical Process Engineering, University of Stuttgart, Boeblinger Str. 78, 70199 Stuttgart, Germany.

4Chemical Resource Beneficiation Faculty of Natural Sciences, North-West University, Potchefstroom 2520, South Africa.

5Forschungszentrum Jülich GmbH. Helmholtz Institute Erlangen-Nürnberg for Renewable Energies (IEK-11), Egerlandstr. 3, 91058 Erlangen, Germany.

6Organic Materials Science, Sandia National Laboratories, Albuquerque, New Mexico 87185, USA.

7Department of Chemical and Biological Engineering, Center for Micro-Engineered Materials (CMEM), The University of New Mexico, Albuquerque, New Mexico 87231, USA; Theoretical Division, Los Alamos National Laboratory, Los Alamos, New Mexico 87545, USA.

8Materials Science and Engineering Department, University of Connecticut, Storrs, CT 06269, USA.

9Toyota Research Institute of North America, Ann Arbor, Michigan 48105, USA.

⊥ These authors contributed equally to this work.

*Correspondence to: [yskim@lanl.gov](mailto:yskim@lanl.gov)

**This PDF file includes:**

Figs. S1 to S15

**Figure S1 | DFT calculations on protonation of PFPA. (A)** Linear regression fit to deprotonation energies using the difference in DFT calculated electronic energy (*E*) of A- and HA. The *E* values are calculated using SMD solvation model with water as solvent at the M062X/6-311++G(d,p) level. Equation of line is determined as with *R2* of 0.90 and rms error of 0.2 p*K*a units. **(B)** Optimized structure of one fluoroethanesulfonic acid in interaction with three PFPAs.


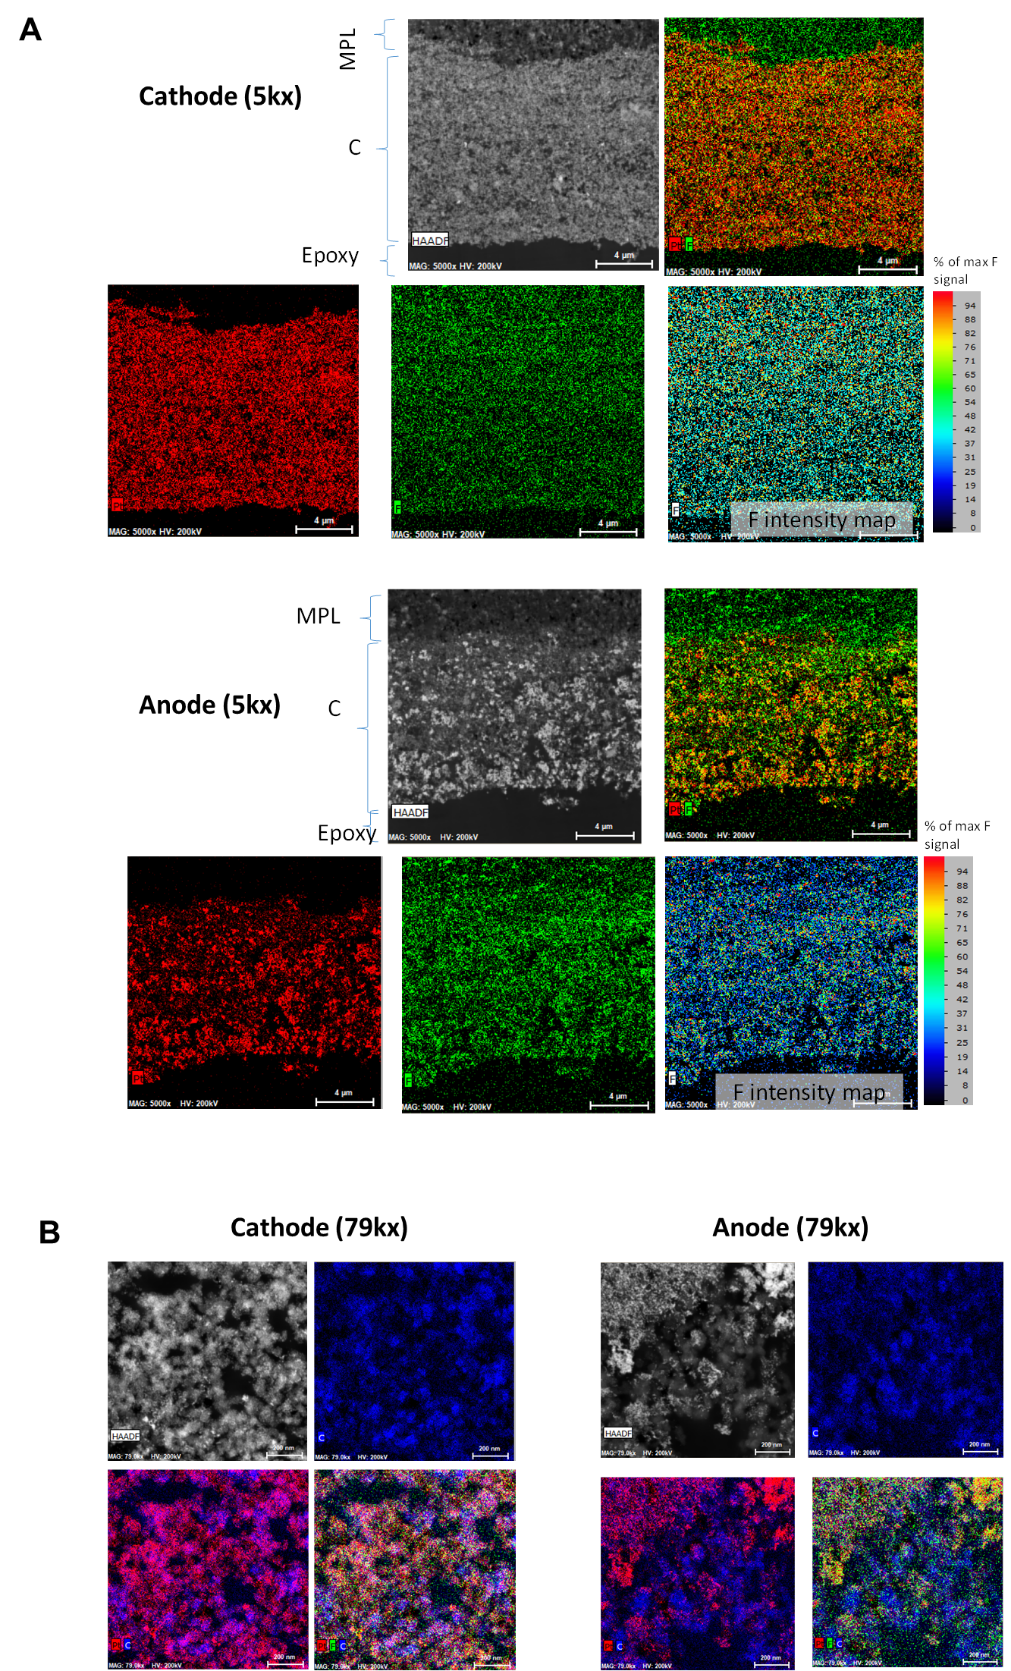


**Figure S2 | HAADF-STEM images and corresponding EDS elemental maps (Pt + F + C) of the composite ionomer-bonded electrodes. (A)** Cathode and anode gas diffusion electrodes with 5kx magnification **(B)** Cathode and anode gas diffusion electrodes with 79kx magnification. Composite ionomer: Nafion/PWN-1.8 (Nafion content = 0.5). Pt: Red, F: Green.

**Figure S3 | Proton conductivity of Nafion, PWN, and Nafion/PWN mixture in DMSO (solid content: 5 wt%).** PWN-0, 0.9, 1.3, 1.8 and 3.0. The Nafion content of the ionomer = 0.5.

Compared to the conductivity in NMP, the conductivity of Nafion, PWN, and Nafion/PWN increased in DMSO. NMP is a weak base that neutralizes acidic protons from Nafion and PWN, while slightly acidic DMSO enhances the proton conduction.

**Figure S4 | EIS characterization of MEA using the Nafion/PWN composite ionomer as a function of IEC of PWN. (A)** 0.8 V **(B)** 0.6 V and **(C)** 2 A cm-2. Composite ionomers: Nafion/PWN-0.9, Nafion/PWN-1.8 and Nafion/PWN-3.0 (Nafion content = 0.5). The impedance with frequency range from 1 MHz to 0.1 Hz was measured under H2/O2 conditions at 160 °C and 170 kPa backpressure.

**Figure S5 | EIS characterization of MEA using the Nafion, (1:0), protonated phosphonic acid and non-protonated phosphonic acid ionomers. (A)** 0.8 V **(B)** 0.6 V and **(C)** 2 A cm-2. Ionomers: Nafion (Nafion content = 1), protonated phosphonic acid ionomer (Nafion content = 0.4), non-protonated phosphonic acid ionomer (Nafion content = 0). The impedance was measured with frequency range from 1 MHz to 0.1 Hz under H2/O2 condition at 160 °C and 170 kPa backpressure.

**Figure S6 | H2/O2 fuel cell performance of MEAs employing Nafion/PWN-1.8 as a function of Nafion content.** MEA component: QAPOH-PA ion-pair membrane, anode (Pt-Ru/C, 0.5 mgPt cm-2), and cathode (Pt/C, 0.7 mgPt cm-2).


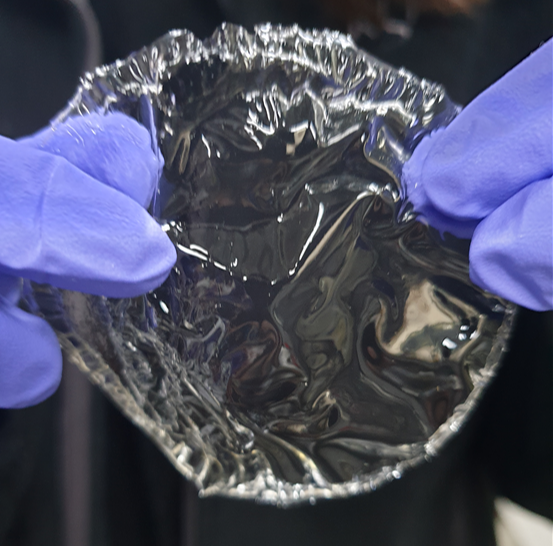

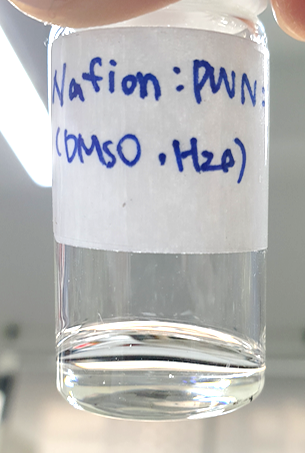

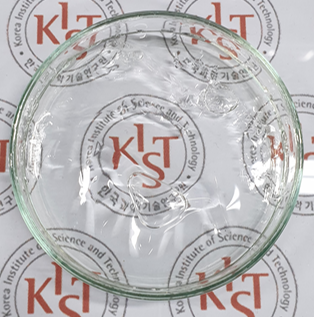


**Figure S7 | Solution casting process of PWN/Nafion.** (1) Mix of 5 % Nafion dispersion (Nafion D520, 5 wt%) with 5% PWN solution in DMSO (5 wt%), (2) Pour the blended solution on a glass dish and dry at 80 °C (3) Detach the membrane after immersing the membrane cast dish in water.

**Figure S8 | HFR of MEAs employing Nafion/PWN-1.8 as a function of temperature.** MEA component: QAPOH-PA ion-pair membrane, anode (Pt-Ru/C, 0.5 mgPt cm-2), and cathode (Pt/C, 0.7 mgPt cm-2).

**Figure S9 | H2/air fuel cell performance of Nafion-based LT-PEMFCs at 100 °C as a function of RH.** *i-*V curve, power density and HFR of Nafion LT-PEMFC at 100 °C and 148 kPa (absolute) backpressure and high H2/air flows (500/500 sccm). Nafion MEA component: Nafion 211 membrane (25 µm thickness), Nafion ionomer, anode and cathode (TEC10E40E, Pt/C, 0.1 mgPt cm-2).

**Figure S10 | Effect of cathode catalyst loading on H2/air fuel cell performance.** Cathode catalyst: **(A)** HiSPEC 9100: Pt 60% on high surface area carbon (Johnson Matthey). **(B)** TEC10E40E: Pt 40% on high surface area carbon. **(C)** TEC10E20E: Pt 20% on high surface area carbon. Theother MEA components: QAPOH-PA membrane (35 µm thick), anode catalyst (Pt-Ru/C, 0.5 mgPt cm-2), cathode catalyst (Pt/C, 0.1, 0.3, and 0.6 mgPt cm-2), and Nafion/PWN-1.8 ionomer (Nafion content: 0.5). The performance was measured at 160 °C under anhydrous conditions.

**Figure S11 | Effect of cathode reactant gas flow rate on H2/air fuel cell performance.** MEA component: QAPOH-PA membrane (35 µm thick), anode catalyst (Pt-Ru/C, 0.5 mgPt cm-2), cathode catalyst (Pt/C, HiSPECTM 0.6 mgPt cm-2), and Nafion/PWN-1.8 ionomer (Nafion content: 0.5).

**Figure S12 | Comparison of H2/air fuel cell performance of different MEAs at 120 °C.** Protonated ionomer-bonded MEA: QAPOH-PA membrane (35 µm thickness), Nafion/ PWN-1.8 ionomer (Nafion content: 0.5), anode (Pt-Ru/C, 0.5 mgPt cm-2), and cathode (Pt/C, 0.3 mgPt cm-2). Commercial PA-PBI: PA-PBI membrane (50 µm thickness), PTFE binder, anode (Pt/C, 1.0 mgPt cm-2), and cathode (Pt-alloy, 0.75 mgPt cm-2). Nafion MEA: Nafion 211 membrane (25 µm thickness), Nafion ionomer, anode (Pt/C, 0.2 mgPt cm-2) and cathode (Pt/C, 0.3 mgPt cm-2).

**Figure S13 | Fuel cell performance of the ion-pair HT-PEMFC 80 °C**. MEA components: QAPOH-PA membrane, anode catalyst (Pt-Ru/C, 0.5 mgPt cm-2), cathode catalyst (Pt/C, 0.6 mgPt cm-2), and Nafion/PWN-1.8 ionomer (Nafion content: 0.5). The performance was measured under anhydrous conditions.

**Figure S14 | Performance change during the 2,500-hour durability test.** *i-*V curve, power density and HFR of the ion-pair HT-PEMFC at 100 °C and 148 kPa (absolute) backpressure and high H2/air flows (500/500 sccm). MEA component: QAPOH-PA ion-pair membrane (40 µm thickness), Nafion/PWN-1.8 composite ionomer Nafion content = 0.5), anode (Pt-Ru/C, 0.5 mgPt cm-2), and cathode (Pt/C 0.6 mgPt cm-2).

**Figure S15 | (A)** Temperature AST cycling profile (40−160 °C). **(B)** Temperature cycling durability of PA-PBI HT-PEMFC. The cell current density was measured at a constant cell voltage of 0.5 V under anhydrous conditions. H2/air were supplied with 148 kPa backpressure and the stoichiometry of 24/10. After the first 7 cycles, the cell was inoperable.
